# Supplementary material
Source: PubMed Central journal article supplement (PMC3683103)
Supplement: NIHMS439379-supplement-supplement_1.pdf [file NIHMS439379-supplement-supplement_1.pdf]

|                              |                  |
|------------------------------|------------------|
| Primary cultured melanocytes | Melanocytes1 *   |
|                              | Melanocytes c261 |
|                              | Melanocytes c264 |
|                              | Melanocytes c293 |
|                              | Melanocytes c295 |
|                              | HFSC             |
|                              | HMAP             |
| Congenital Nevi              | YUOPE            |
|                              | YUVATI           |
|                              | YUCLIR           |
| Melanoma cell lines          | MelJuSo *        |
|                              | UACC903 *        |
|                              | C8161 *          |
|                              | Neo6/C8161 *     |
|                              | WM1205 *         |
|                              | WM455 *          |
|                              | WM1366 *         |
|                              | WM293A *         |
|                              | WM35 *           |
|                              | Roth*            |
|                              | Carney *         |
|                              | WM793 *          |
|                              | Swift-Mel *      |
|                              | YULAC            |
|                              | YURIF            |
|                              | YUSIK            |
|                              | WW165            |
|                              | MEL501           |
| YUCAL                        |                  |
| YUMAC                        |                  |
| Melanoma tumor tissues       | 86002 *          |
|                              | 86008 *          |
|                              | 86016 *          |
|                              | 86060 *          |
|                              | 86075 *          |
|                              | 86134 *          |
|                              | 86140 *          |
|                              | 86187 *          |
|                              | 86221 *          |
|                              | 86233 *          |
|                              | 86246 *          |
|                              | 86296 *          |
|                              | 86304 *          |
|                              | 86307 *          |
|                              | 86335 *          |
|                              | 86338 *          |
|                              | 86392 *          |
|                              | 86393 *          |
|                              | 86396 *          |
|                              | 86397 *          |
|                              | YURER            |
|                              | YUTUR            |
|                              | YUKIL            |
|                              | YUPAO            |
|                              | YUROL            |
|                              | YUPER            |
|                              | YUHUY            |
|                              | YUBUNE           |
| YUKOLI                       |                  |
| YUCHER                       |                  |
| YUFIT                        |                  |
| YUHGIN                       |                  |
| YUKAY                        |                  |
| YUMUT                        |                  |

**Table 3. List of samples analyzed for promoter hypermethylation of LXN.** Gray shading indicates presence of methylation. Light gray indicates partial methylation. Star indicates – methylation previously reported in Muthusamy et al 2006.
